# Supplementary material
Source: PubMed Central journal article supplement (PMC4899196)
Supplement: NIHMS786865-supplement.pdf [file NIHMS786865-supplement.pdf]

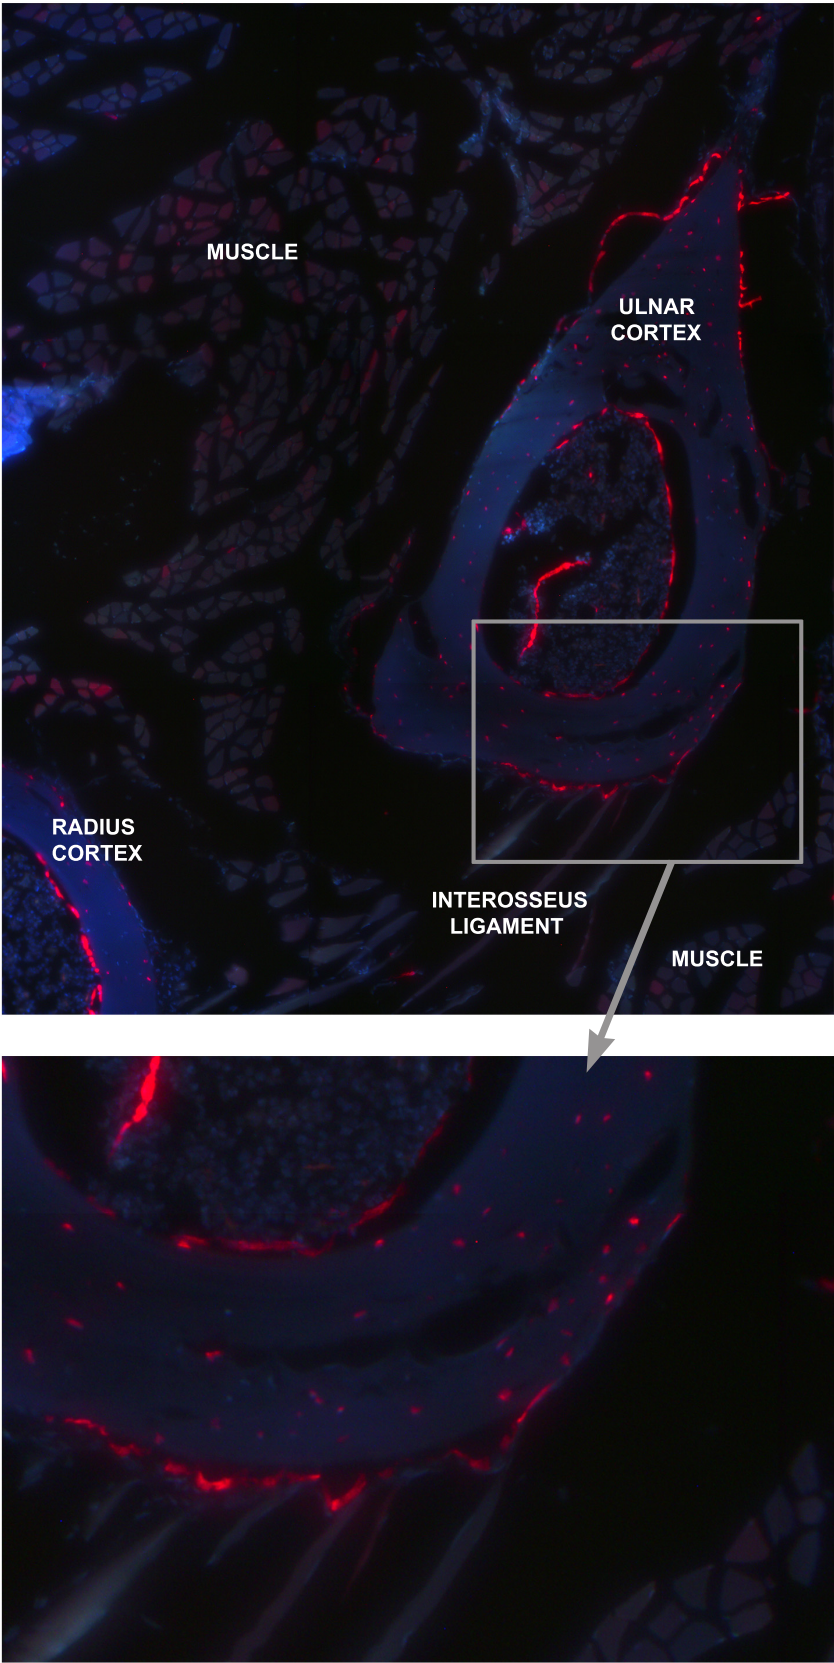

Figure S1

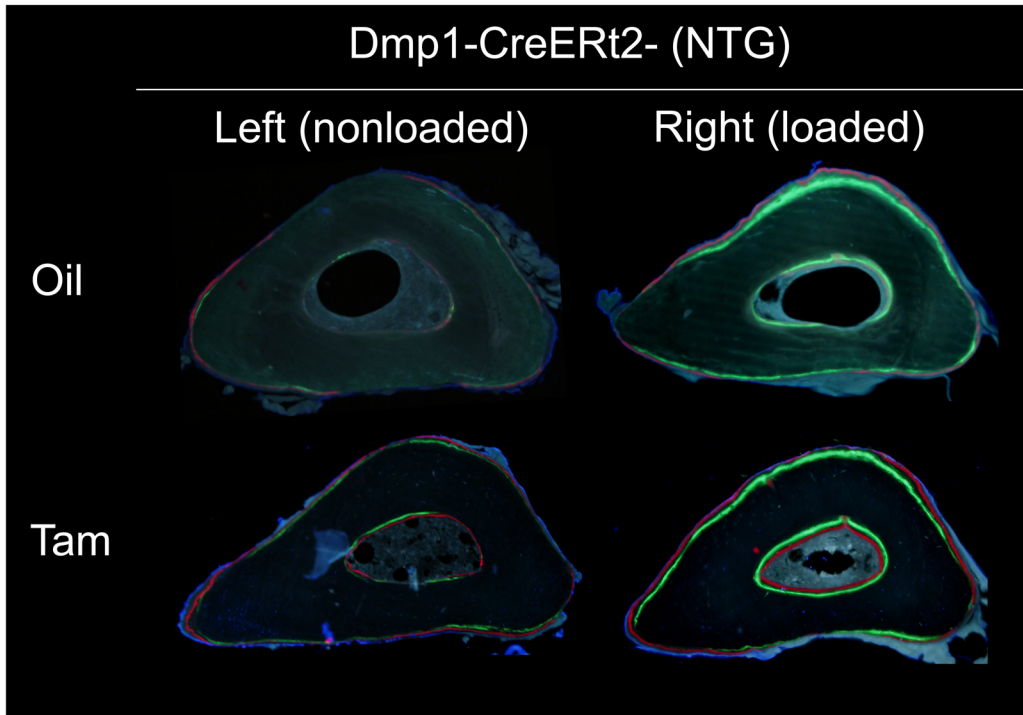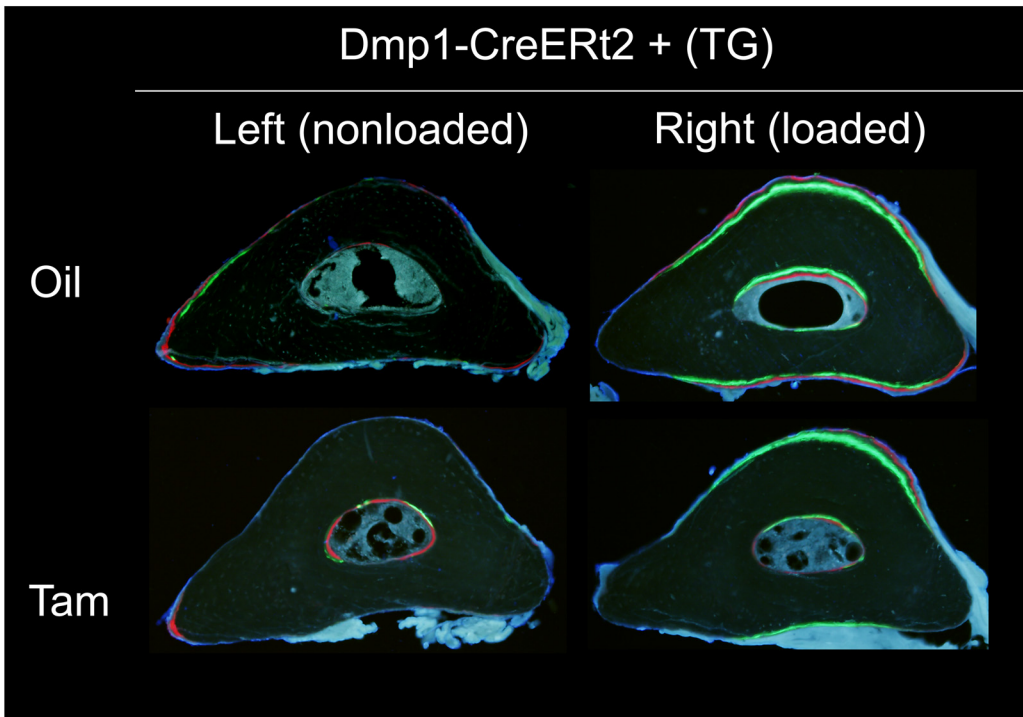

Figure S2

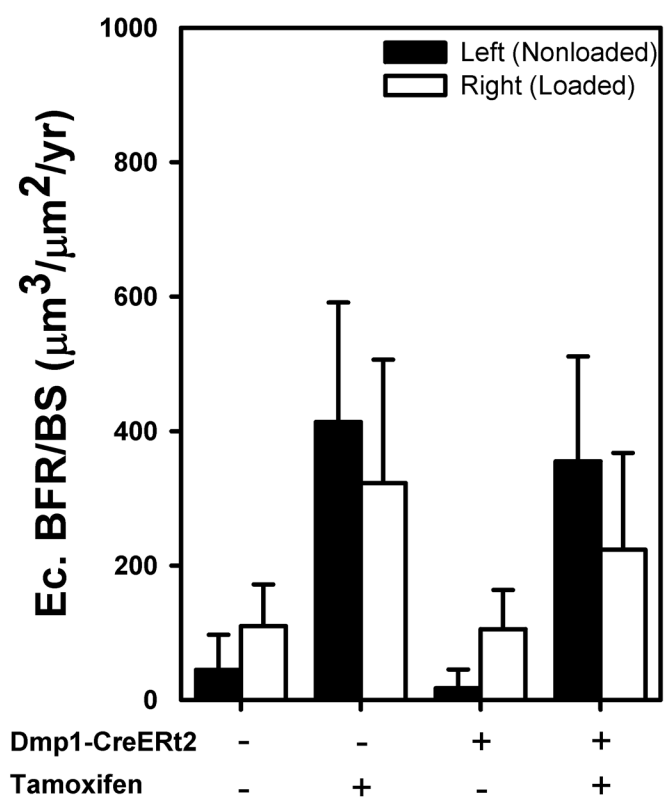

Figure S3

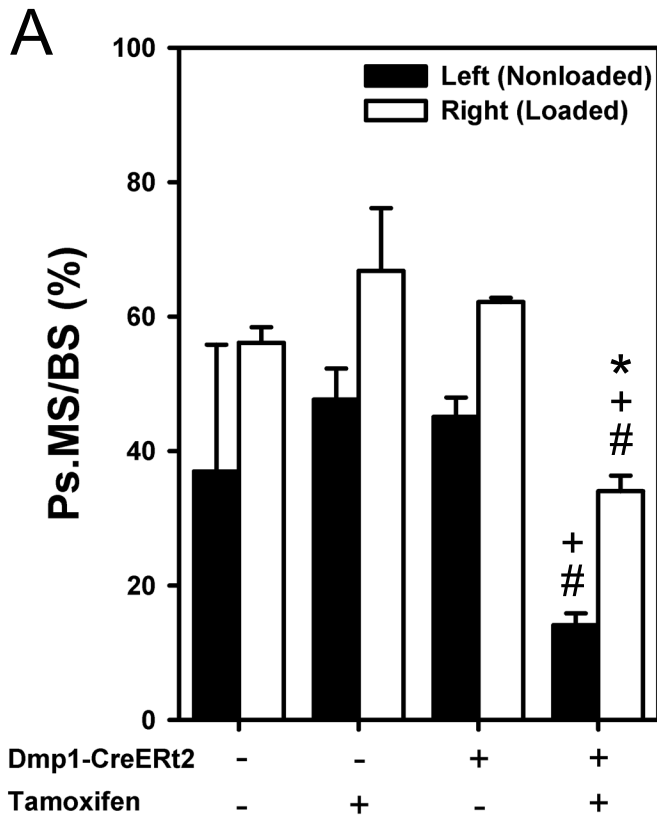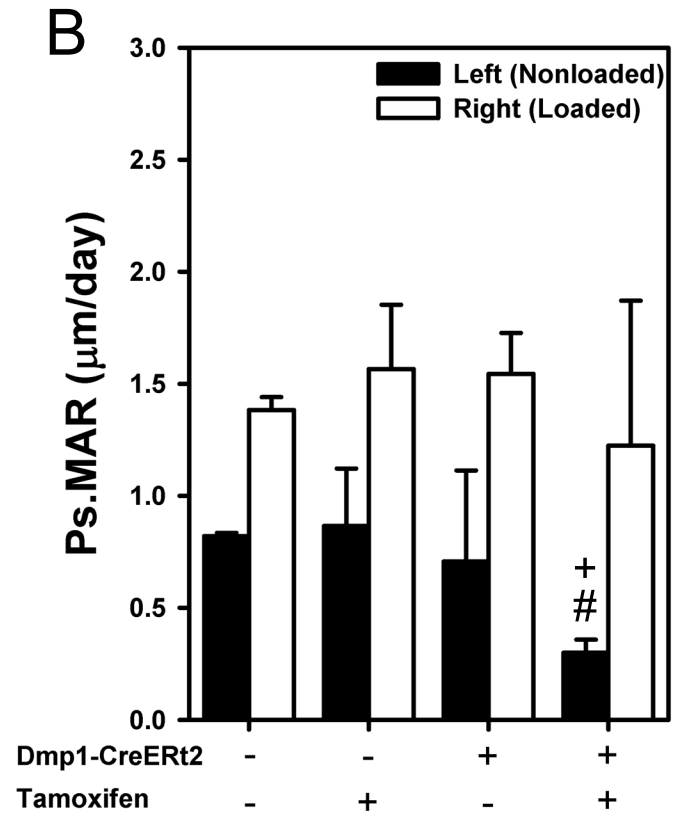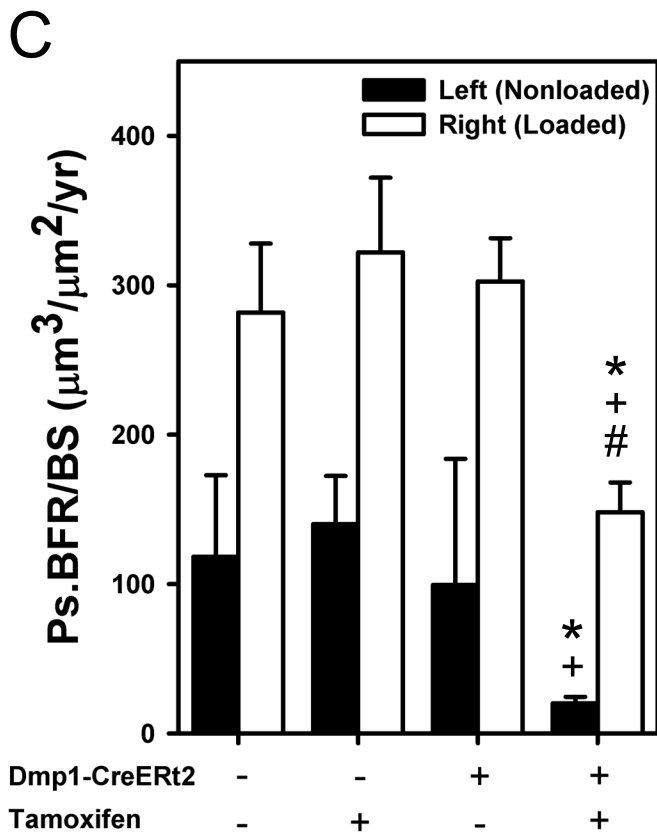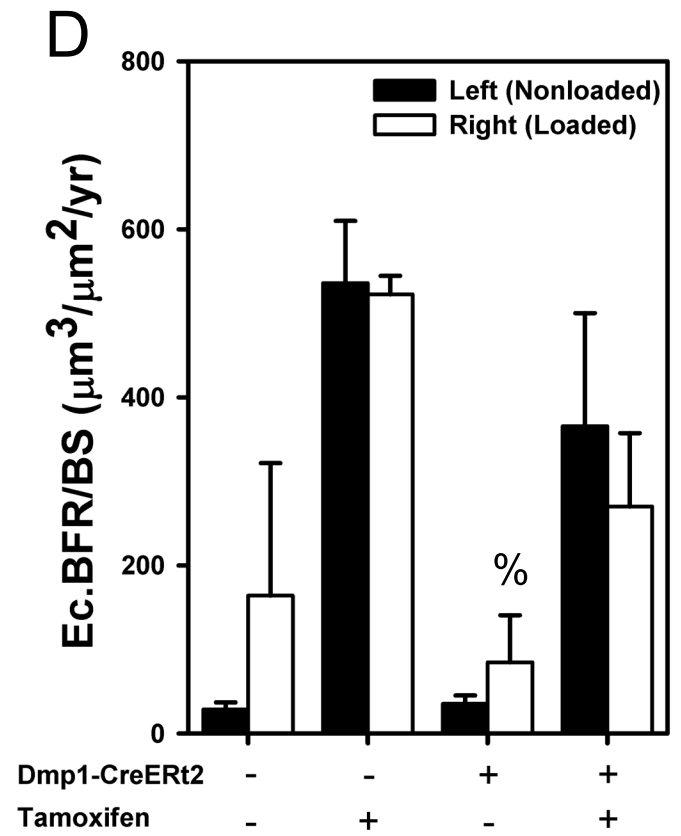

Figure S4

TABLE S1: Midshaft ulnar areal properties measured by ImageJ in the nonloaded (NL) and loaded (L) ulnae from mice with and without the Dmp1-CreERT2 transgene, treated with corn oil (Oil) or tamoxifen (Tam).

| Dmp1-CreERT2:            | CreERT2 -         |                    |                   |                    | CreERT2 +         |                    |                   |                    |
|--------------------------|-------------------|--------------------|-------------------|--------------------|-------------------|--------------------|-------------------|--------------------|
|                          | Oil               |                    | Tam               |                    | Oil               |                    | Tam               |                    |
|                          | NL                | L                  | NL                | L                  | NL                | L                  | NL                | L                  |
| Tt.Ar (mm <sup>2</sup> ) | 1.078 ±0.028 (10) | 1.125 ±0.029* (10) | 1.084 ±0.022 (10) | 1.139 ±0.023* (10) | 1.011 ±0.038 (10) | 1.071 ±0.038* (10) | 1.009 ±0.033 (10) | 1.039 ±0.032* (10) |
| B.Ar (mm <sup>2</sup> )  | 0.873 ±0.013 (10) | 0.924 ±0.014* (10) | 0.906 ±0.018 (10) | 0.983 ±0.020* (10) | 0.859 ±0.029 (10) | 0.926 ±0.031* (10) | 0.873 ±0.018 (10) | 0.913 ±0.017* (10) |
| Ma.Ar (mm <sup>2</sup> ) | 0.205 ±0.020 (10) | 0.201 ±0.020* (10) | 0.178 ±0.011 (10) | 0.156 ±0.011* (10) | 0.152 ±0.014 (10) | 0.145 ±0.014* (10) | 0.136 ±0.019 (10) | 0.126 ±0.018* (10) |

<sup>A</sup>Values presented are mean ± SEM (*n*=).

\* represents *p* < 0.05 compared to nonloaded values.

#
